# Supplementary material for: Glucose-induced posttranslational activation of protein phosphatases PP2A and PP1 in yeast
Source: PubMed Central journal article supplement — Cell Res. 2012 Jan 31;22(6):1058–77. doi: 10.1038/cr.2012.20 (PMC3367521; doi:10.1038/cr.2012.20), 2012-01-31
Supplement: cr201220x2.pdf [file cr201220x2.pdf]

**A**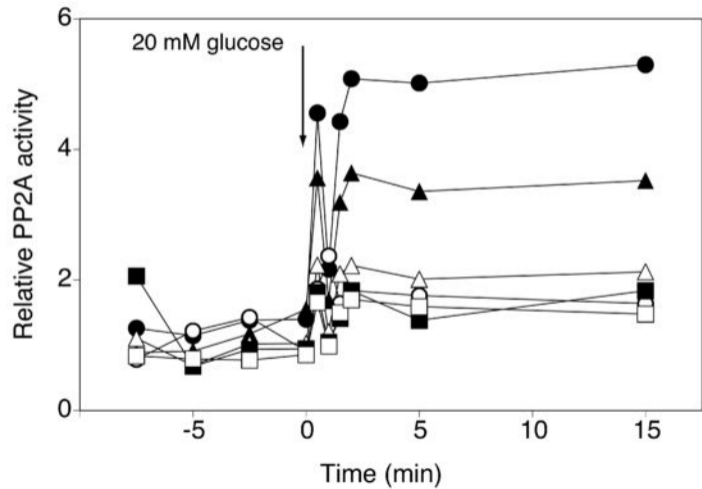**B**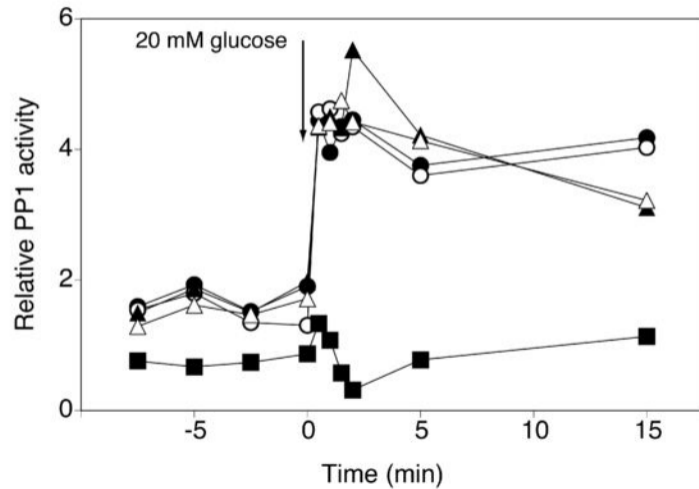

**Figure S1 Optimization of okadaic concentration used for specific PP2A inhibition.** At time zero 20 mM glucose was added and cell extracts were used to measure protein phosphatase activity. A. Wild type strain in the presence of inhibitor-2 and increasing concentrations of okadaic acid: 0 mM (●), 10 mM (○), 15 mM (▲), 20 mM (△) and 25 mM (■). B. *pph21Δ pph22Δ* with increasing concentrations of okadaic acid: 0 mM (●), 10 mM (○), 15 mM (▲) and 20 mM (△), and with inhibitor-2 (■).
