# Supplementary material for: Glucose-induced posttranslational activation of protein phosphatases PP2A and PP1 in yeast
Source: PubMed Central journal article supplement — Cell Res. 2012 Jan 31;22(6):1058–77. doi: 10.1038/cr.2012.20 (PMC3367521; doi:10.1038/cr.2012.20), 2012-01-31
Supplement: cr201220x5.pdf [file cr201220x5.pdf]

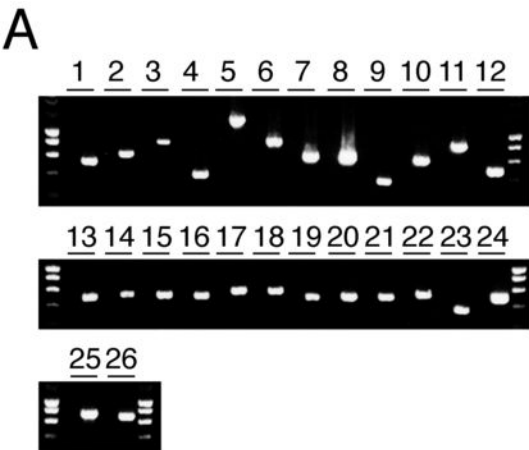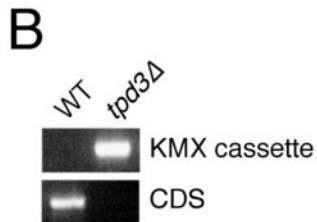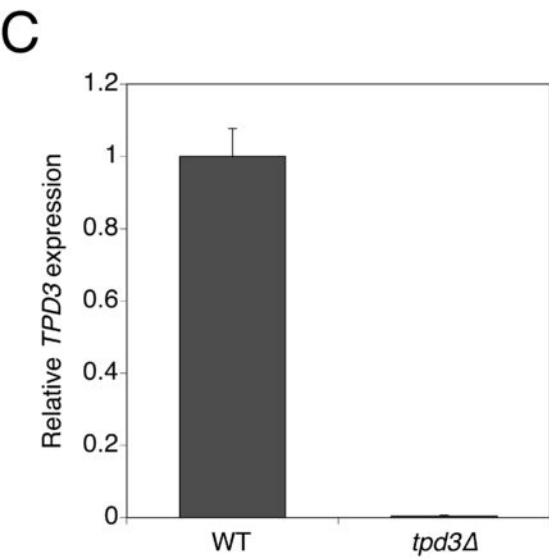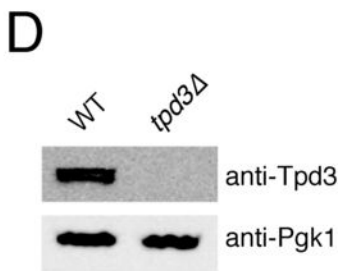

**Figure S4 Confirmation of all gene deletions, and in particular deletion of *TPD3*.**

Using a forward primer in the kanamycin gene deletion cassette and a reverse primer in the genomic region behind the coding sequence of the deleted gene, proper deletion of these genes was confirmed by comparison PCR of a wild type strain (left) and the strain carrying the deletion of interest (right). Genes for which the deletion was checked are: (1) *PPH21*, (2) *PPH22*, (3) *GLC7*, (4) *RTS1*, (5) *CDC55*, (6) *TPD3*, (7) *RRD1*, (8) *RRD2*, (9) *PPM1*, (10) *PPM2*, (11) *PPE1*, (12) *REG1*, (13) *REG2*, (14) *PIG1*, (15) *PIG2*, (16) *GLC8*, (17) *RED1*, (18) *GAC1*, (19) *GIP1*, (20) *GIP2*, (21) *SHP1*, (22) *BNI14*, (23) *BUD14*, (24) *SIP5*, (25) *HXK2* and (26) *SNF1*. B-D. Deletion of the *TPD3* gene was confirmed in more detail: the presence of the kanamycin (KMX) cassette, the absence of the wild type *TPD3* gene (PCR, panel B), the absence of expression from the *TPD3* gene (RT qPCR, panel C) and the absence of the Tpd3 protein (Western blot with Pgk1 as housekeeping protein, panel D) is shown for the *tpd3Δ* strain and the wild type (WT).
