# Supplementary material for: Glucose-induced posttranslational activation of protein phosphatases PP2A and PP1 in yeast
Source: PubMed Central journal article supplement — Cell Res. 2012 Jan 31;22(6):1058–77. doi: 10.1038/cr.2012.20 (PMC3367521; doi:10.1038/cr.2012.20), 2012-01-31
Supplement: cr201220x6.pdf [file cr201220x6.pdf]

## IP

strain

-

anti-Rts1

anti-Rts1

*tpd3Δ**tpd3Δ*

WT

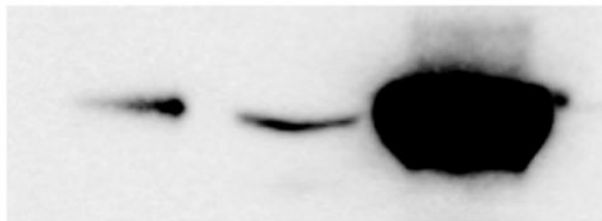

anti-HA

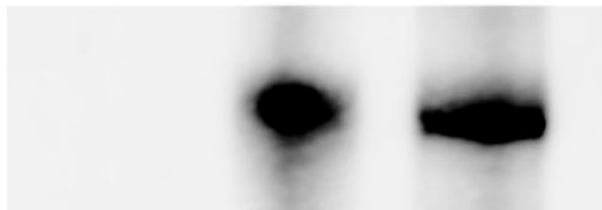

anti-Rts1

**Figure S5 Rts1 does not interact with Pph21 in a *tpd3*Δ strain.** Cells lacking Tpd3 were grown to exponential phase in glucose-deprived conditions. After addition of 20 mM glucose for 2 minutes, cells were extracted and immunopurified using no antibody and anti-Rts1 respectively. Subsequent western blot analysis showed no detectable interaction of the PP2A catalytic subunit with Rts1.
