# Supplementary material for: Glucose-induced posttranslational activation of protein phosphatases PP2A and PP1 in yeast
Source: PubMed Central journal article supplement — Cell Res. 2012 Jan 31;22(6):1058–77. doi: 10.1038/cr.2012.20 (PMC3367521; doi:10.1038/cr.2012.20), 2012-01-31
Supplement: cr201220x7.pdf [file cr201220x7.pdf]

**A**

Relative expression compared to wild type

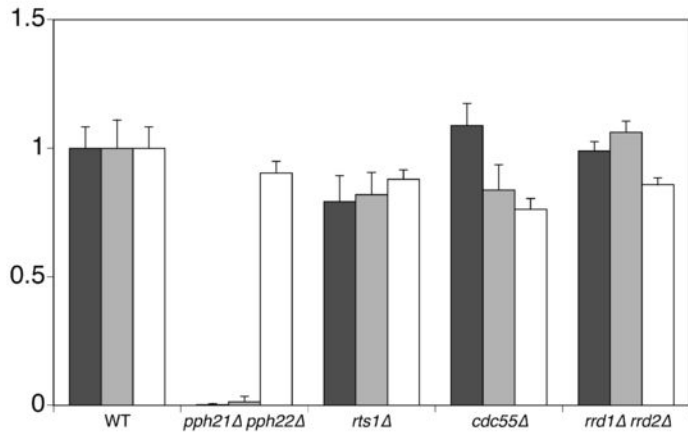**B**

Relative expression compared to wild type

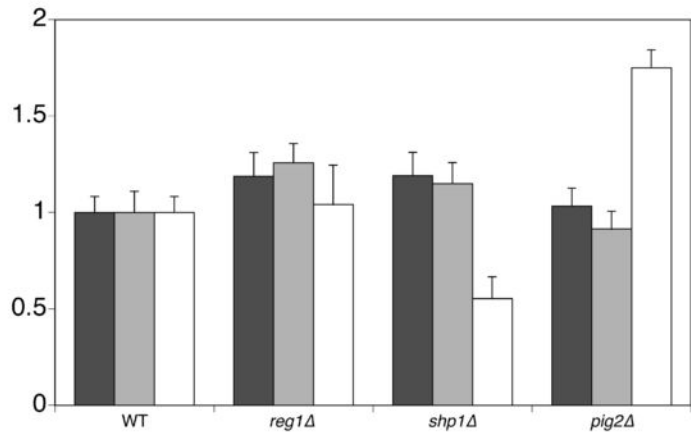

**Figure S6 Expression of catalytic subunits of PP2A and PP1 is unaffected in strains showing altered glucose-induced phosphatase activation.** By RT qPCR, the expression of *PPH21* (dark grey bars), *PPH22* (light bars) and *GLC7* (white bars) was determined in all strains showing altered phosphatase activation. A. Strains lacking PP2A subunits Pph21 and Pph22, Rts1, Cdc55 or Rrd1 and Rrd2. B. Strains lacking PP1 subunits Reg1, Shp1 or Pig2.
