# Supplementary material for: Glucose-induced posttranslational activation of protein phosphatases PP2A and PP1 in yeast
Source: PubMed Central journal article supplement — Cell Res. 2012 Jan 31;22(6):1058–77. doi: 10.1038/cr.2012.20 (PMC3367521; doi:10.1038/cr.2012.20), 2012-01-31
Supplement: cr201220x8.pdf [file cr201220x8.pdf]

**A**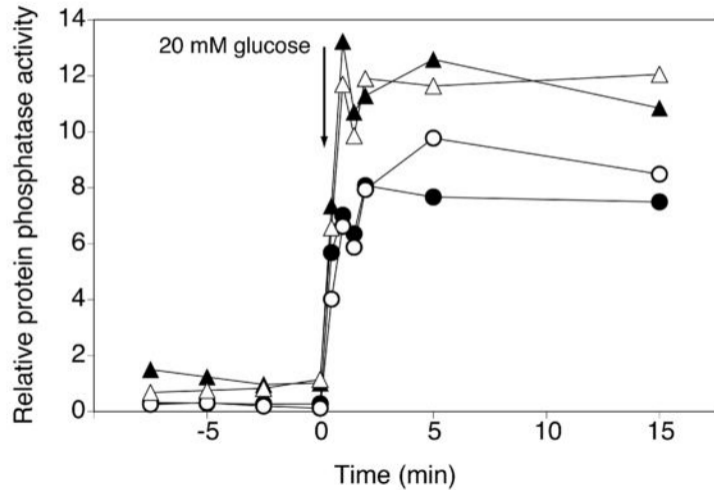**B**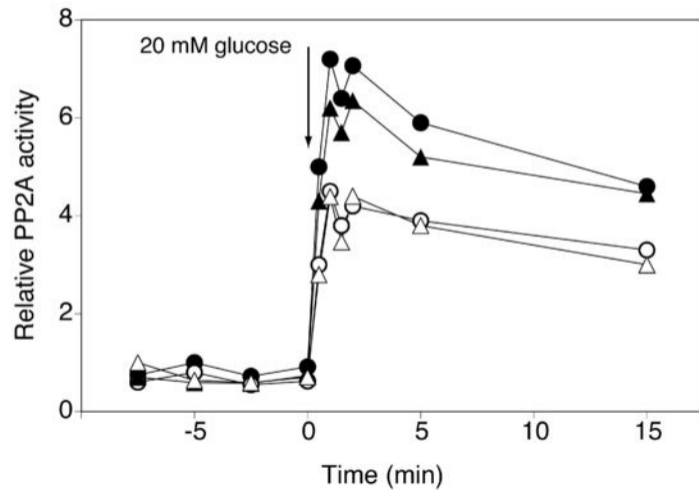

**Figure S7 Both PP2A and PP1 are activated by glucose in a post-translational manner, and for PP2A, methylation by Ppm1 is partially required.** At time zero 20 mM glucose was added to different deletion strains and cell extracts were used to measure protein phosphatase activity in the presence of the appropriate inhibitor. A. PP2A activity (presence of inhibitor-2) (● and ○) or PP1 activity (presence of okadaic acid) (▲ and △): wild type strain in the absence (● and ▲) and in the presence of cycloheximide (100µg/ml) added 15 minutes before addition of glucose (○ and △). B. PP2A activity (presence of inhibitor-2): wild type strain (●), *ppm1*Δ (○), *ppm2*Δ (▲), *ppm1*Δ *ppm2*Δ (△).
